# Supplementary material for: New Cases of Hypochromic Microcytic Anemia Due to Mutations in the SLC11A2 Gene and Functional Characterization of the G75R Mutation
Source: MDPI journal article supplement (doi:10.3390/ijms23084406), 2022-04-15

Supplementary figures

# **New cases of hypochromic microcytic anemia due to mutations in the *SLC11A2* gene and functional characterization of the G75R mutation**

**Lidia Romero-Cortadellas<sup>1\*</sup>, Gonzalo Hernández<sup>1,2\*</sup>, Xènia Ferrer-Cortès<sup>1,2</sup>, Laura Zalba-Jadraque<sup>2</sup>, José Luis Fuster<sup>3</sup>, Mar Bermúdez-Cortés<sup>3</sup>, Ana María Galera-Miñarro<sup>3</sup>, Santiago Pérez-Montero<sup>2</sup>, Cristian Tornador<sup>2</sup> and Mayka Sánchez<sup>1,2\*\*</sup>**

<sup>1</sup> Universitat Internacional de Catalunya (UIC), Department of Basic Sciences, Iron metabolism: Regulation and Diseases. Sant Cugat del Vallès, Spain.

<sup>2</sup> BloodGenetics S.L. Diagnostics in Inherited Blood Diseases. Esplugues de Llobregat, Spain.

<sup>3</sup> Pediatric OncoHematology Service, Clinic University Hospital Virgen de la Arrixaca, Instituto Murciano de Investigación Biosanitaria (IMIB), Murcia, Spain.

\* These authors contributed equally to this work

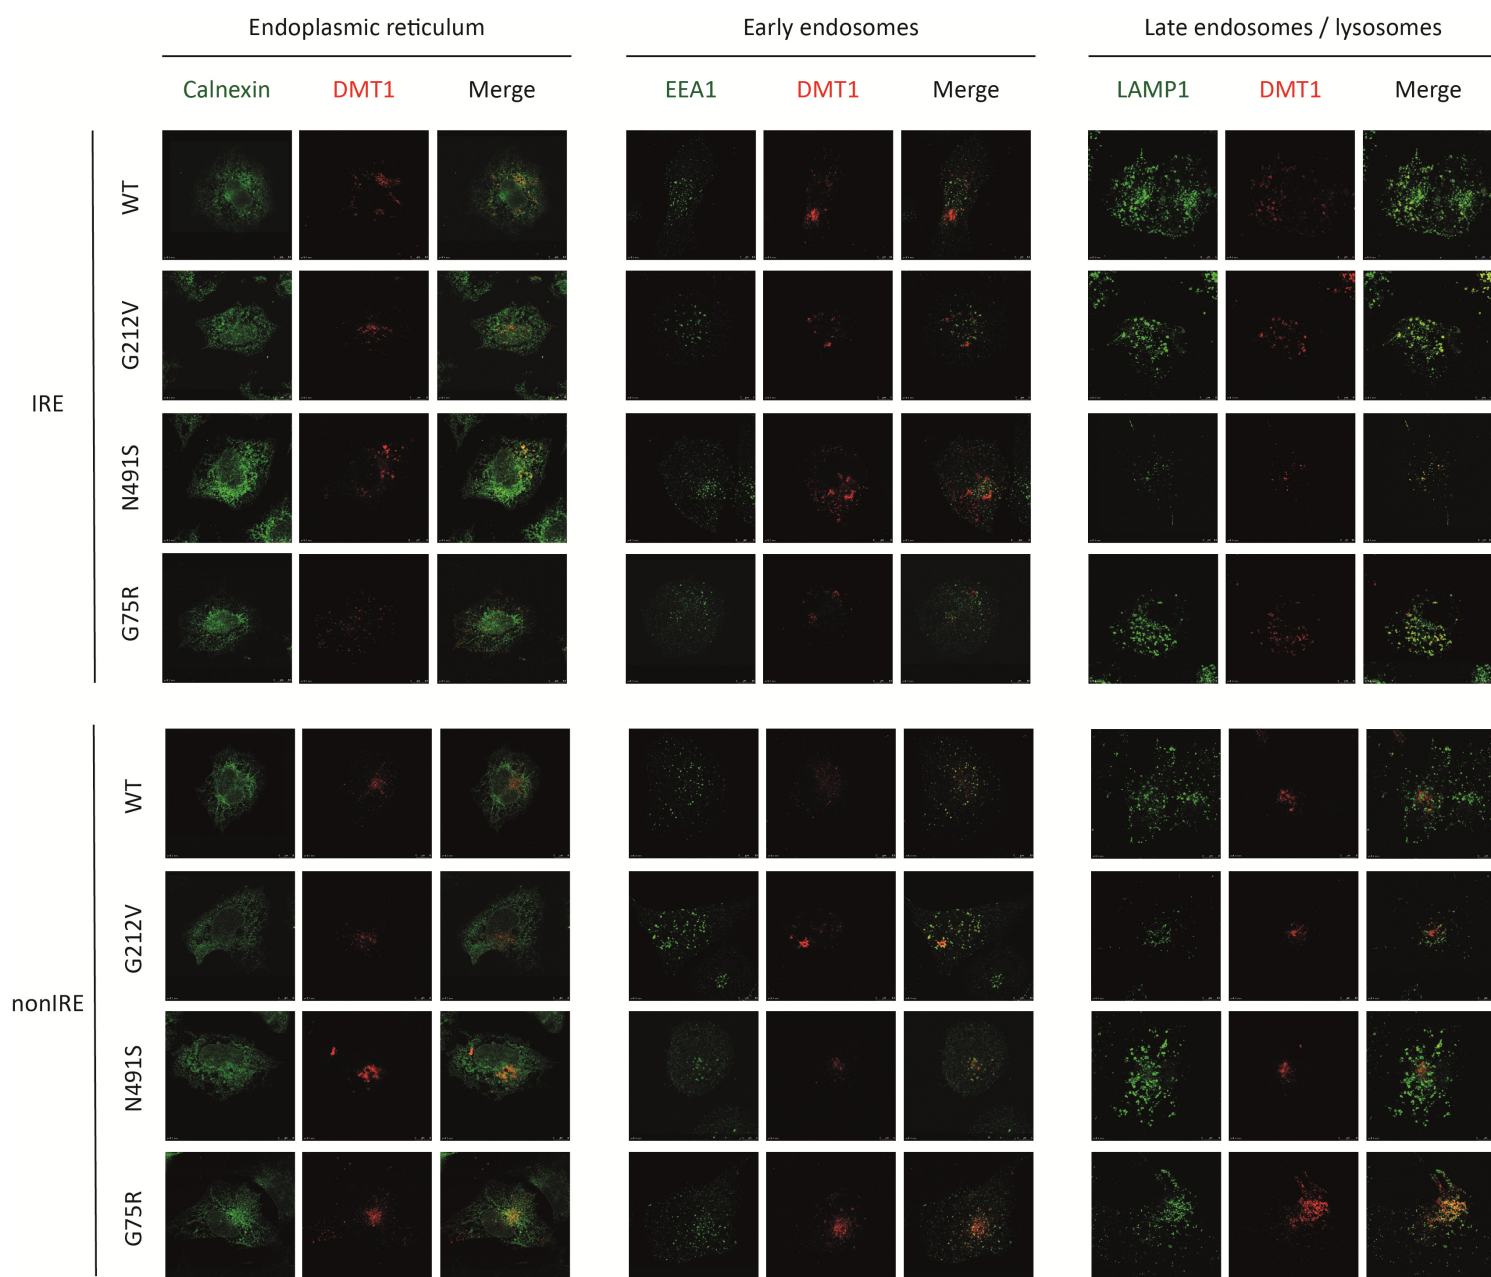

**Supplementary Figure S1. Subcellular localization of wild-type and mutated DMT1 isoforms.**

Hutu-80 cells were transiently transfected with a pdsRed2-C1 construct with wild-type (WT), G212V, N491S and G75R mutants of -IRE and -nonIRE isoforms. Cells were incubated with Alexa 488-tagged primary antibodies: anti-calnexin to label endoplasmic reticulum and rabbit anti-LAMP1 to label late endosomes/lysosomes. The figure shows representative split and merged images for each experiment. IRE: iron-responsive element.

**Supplementary Figure S2. Comparison of –IRE and –nonIRE DMT1 isoforms’ subcellular localization.** Co-localization is expressed as the percentage of DMT1 in the corresponding organelle (n=50). For the WT and each DMT1 mutation (G212V, N491S, G75R), co-localization of the -IRE versus the -nonIRE form in the endoplasmic reticulum (ER; A), early endosomes (B) and late endosomes/lysosomes (C) is compared.  $p < 0.05$  was considered significant. \*\*\*\* $p < 0.0001$ .

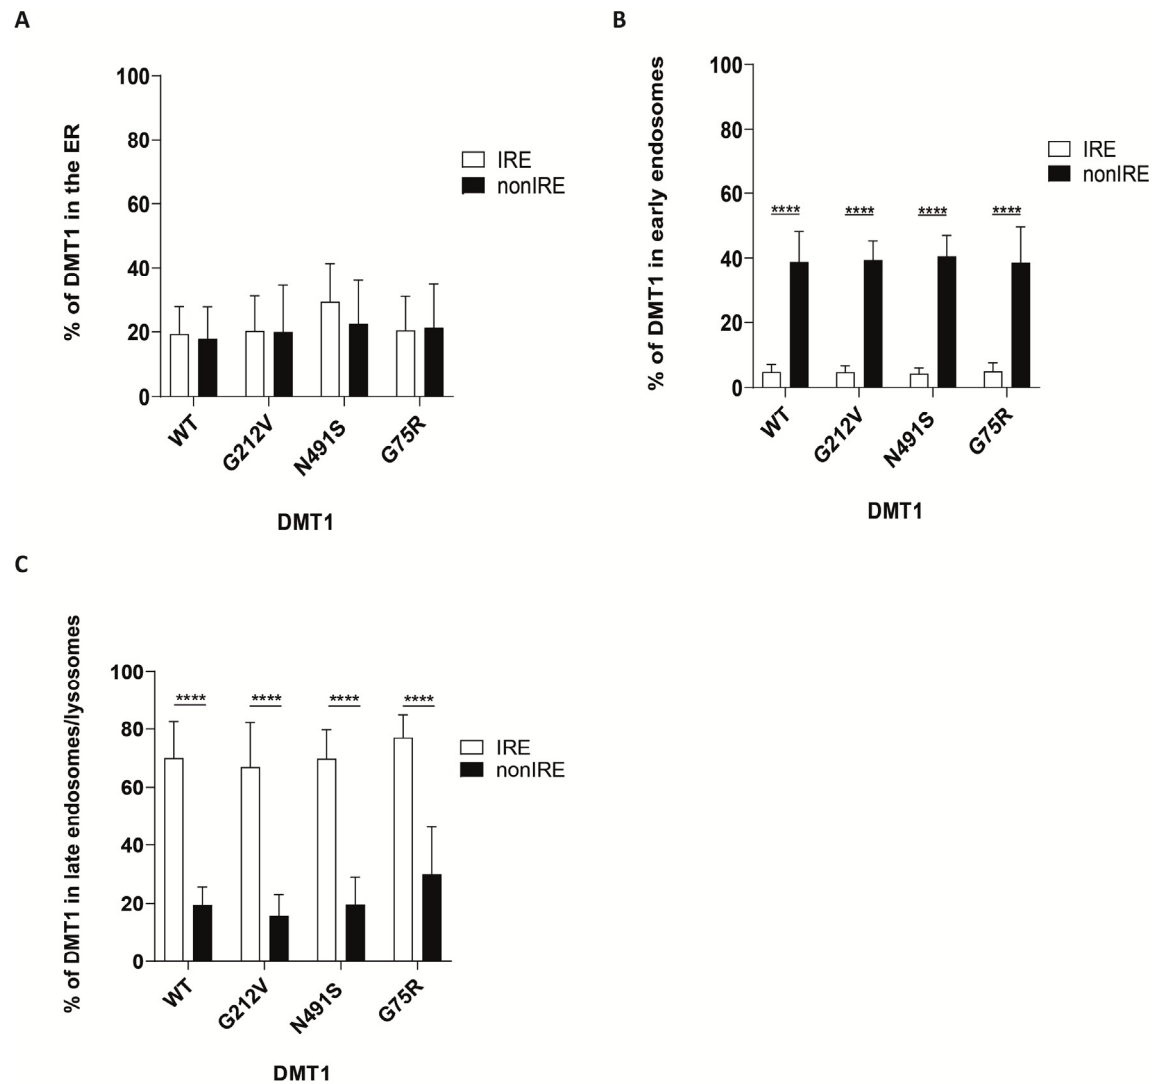

Supplement: s1 [file s1]
